# Supplementary material
Source: Springer Nature journal article supplement (https://www.springermedizin.de/resource/supplementary/13014_2011_493_MOESM12_ESM.pdf/9633538)
Supplement: MOESM12 [file 9633538]

## **Tables**

### **Table 1 - Specification of Perspex in GEANT4**

hydrogen in water (TS\_H\_of\_Water) was used for the thermal scattering of neutrons; \*natural composition of isotopes
